# Supplementary material for: HDR: a statistical two-step approach successfully identifies disease genes in autosomal recessive families
Source: PubMed Central journal article supplement — J Hum Genet. 2016 Jun 30;61(11):959–63. doi: 10.1038/jhg.2016.85 (PMC5411490; doi:10.1038/jhg.2016.85), 2016-06-30
Supplement: jhg201685x1.pdf [file jhg201685x1.pdf]

## HDR: A statistical two-step approach successfully identifies disease genes in autosomal recessive families

Atsuko Imai, Masakazu Kohda, Akihiro Nakaya, Yasushi Sakata, Kei Murayama, Akira Ohtake, Mark Lathrop, Yasushi Okazaki, Jurg Ott

### Supplementary Information

#### Random HDR levels

It is of interest to know what levels of HDR we can expect in the absence of disease variants. Consider a variant with two alleles,  $A$  and  $R$ , with alternate (non-wild) allele frequency,  $P(A) = f$ . Assuming Hardy-Weinberg equilibrium, homozygotes  $A/A$  are expected with frequency  $f^2$ . For two unrelated individuals, we expect pairs of genotypes at this variant as given in the following table:

| Individual 1   | Individual 2 |                |
|----------------|--------------|----------------|
|                | homozygous   | not homozygous |
| homozygous     | $f^4$        | $f^2(1-f^2)$   |
| not homozygous | $f^2(1-f^2)$ | N/A            |

The expected value for our Hamming distance ratio is then equal to

$$\text{HDR} = 2 \times f^2(1-f^2) / [2 \times f^2(1-f^2) + f^4] = 1 - f^2 / (2 - f^2).$$

The graph below of HDR as a function of  $f$  shows that for a wide range of allele frequencies,  $0 < f < 0.8$ , the expected value of HDR exceeds 0.50.

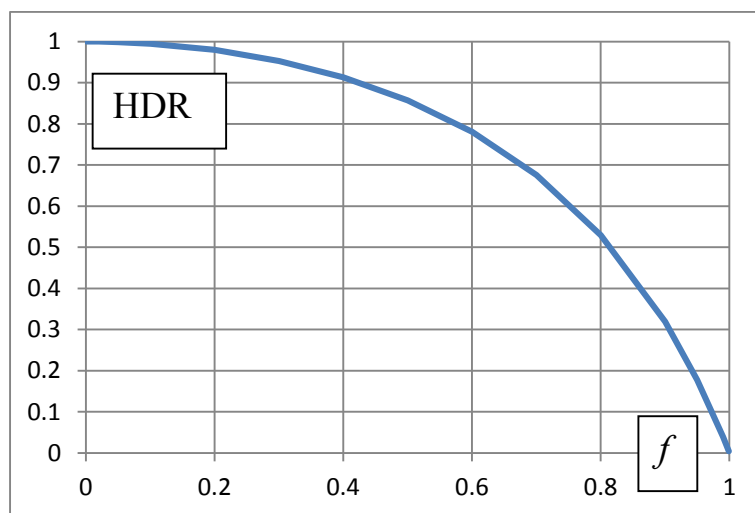

We verified these predictions in our data and found that the majority of control-control HDR values exceeded 0.50.

## Effects of sequencing errors

As suggested by one of the reviewers, we looked at the effects of errors on HDR. We adopted the following simple error model <sup>1</sup>, where  $e$  is a small genotype error:

| <i>Individual 1</i> | <i>Individual 2</i> |                |
|---------------------|---------------------|----------------|
|                     | homozygous          | not homozygous |
| homozygous          | $p_1 - e$           | $p_2 + e/2$    |
| not homozygous      | $p_3 + e/2$         | N/A            |

The Hamming distance ratio then becomes

$$\text{HDR}_e = (p_2 + p_3 + e)/(p_1 + p_2 + p_3) = \text{HDR}_0 + e/(p_1 + p_2 + p_3).$$

Thus, HDR increases or decreases depending on the sign of the error  $e$  (note that this is not always the case – in linkage analysis, for example, some misclassification errors always lead to an upward bias of the recombination fraction estimate <sup>2</sup>). Presumably, random errors will be positive for some variants and negative at others, so the net effect on HDR is likely to be small, as anticipated by the reviewer.

## Supplementary references

1. Gordon, D., Finch, S.J., Nothnagel, M. & Ott, J. Power and sample size calculations for case-control genetic association tests when errors are present: application to single nucleotide polymorphisms. *Hum. Hered.* **54**, 22-33 (2002).
2. Ott, J. Linkage analysis with misclassification at one locus. *Clin. Genet.* **12**, 119-124. (1977).
